# Supplementary material for: Automated Tracking of Whiskers in Videos of Head Fixed Rodents
Source: PLoS Comput Biol. 2012 Jul 5;8(7):e1002591. doi: 10.1371/journal.pcbi.1002591 (PMC3390361; doi:10.1371/journal.pcbi.1002591)
Supplement: Dataset S1 — Sample data and tutorial. (ZIP) [file pcbi.1002591.s001.zip]

Archive with 6 entries (5 files):
- SampleDataAndTutorial/
- SampleDataAndTutorial/.DS_Store
- SampleDataAndTutorial/._.DS_Store
- SampleDataAndTutorial/movie.mp4
- SampleDataAndTutorial/._movie.mp4
- SampleDataAndTutorial/Sample Data and Tutorial.pdf
